# Supplementary material
Source: MDPI journal article supplement (https://www.mdpi.com/2227-9717/8/12/1631)
Supplement: s1 [file s1]

# The original experimental data in the literatures

1. The K/S value data of dyed PET fabrics with disperse blue 79 at 20Mpa in Table 1 of reference [29] are shown in Table S1. The data with \* was the testing and prediction data.

Table S1 Effect of dyeing time and temperature on K/S of dyed PET fabrics.

| Dyeing time<br>/min | Temperature /°C |       |      |       |       |        |
|---------------------|-----------------|-------|------|-------|-------|--------|
|                     | 80              | 90    | 100  | 110   | 120   | 130    |
| 10                  | 1.06            | 1.45  | 2.09 | 4.08  | 7.12  | 18.57  |
| 20                  | 1.42            | 2.15* | 3.11 | 4.99  | 10.04 | 20.54  |
| 30                  | 1.68            | 2.42  | 3.24 | 5.93  | 11.18 | 21.25  |
| 40                  | 1.67            | 2.64  | 4.38 | 6.84* | 12.2  | 21.45  |
| 50                  | 1.69            | 2.76  | 4.92 | 7.54  | 12.3* | 21.56  |
| 60                  | 1.7             | 2.75  | 5.6  | 8.02  | 12.32 | 21.55* |
| 90                  | 1.72            | 2.75  | 5.62 | 8.03  | 12.33 | 21.56  |

2. The K/S value data after acetone wash for fiber dyed for 90 min at 70, 90, 110, and 130 °C in Figure 9 of reference [30] are shown in Table S2. The data with \* was the testing and prediction data.

Table S2 Effect of pressure and temperature on K/S value of dyed fiber

| Pressure<br>/MPa | Temperature /°C |        |        |        |
|------------------|-----------------|--------|--------|--------|
|                  | 70              | 90     | 110    | 130    |
| 12               | 2.81            | 9.81   | 11.07  | 12.22  |
| 13               | 3.44*           | 11.02  | 12.22  | 13.72  |
| 14               | 4.19            | 12.34* | 13.49  | 15.55  |
| 15               | 5.05            | 13.14  | 15.15  | 18.25  |
| 16               | 5.91            | 14.17  | 17.10* | 21.41  |
| 17               | 6.77            | 14.35  | 17.85  | 21.75  |
| 18               | 7.63            | 14.80  | 18.94  | 22.27* |
| 19               | 8.21            | 16.01  | 20.43  | 23.59  |
| 20               | 8.84            | 17.21  | 21.86  | 24.85  |

3. The K/S value data of modified ramie fiber at various temperatures and dyeing time at 20 Mpa in Figure 10 of reference [30] are shown in Table S3. The data with \* was the testing and prediction data.

Table S3 Effect of dyeing time and temperature on K/S value

| Dyeing time<br>/min | Temperature /K |        |        |       |
|---------------------|----------------|--------|--------|-------|
|                     | 70             | 90     | 110    | 130   |
| 15                  | 5.85           | 11.43  | 13.76  | 17.69 |
| 30                  | 7.72*          | 13.16  | 15.63  | 17.97 |
| 60                  | 8.50           | 14.13  | 19.52  | 21.67 |
| 90                  | 9.19           | 17.42* | 21.99  | 25.42 |
| 120                 | 12.11          | 17.82  | 23.36* | 25.65 |
| 150                 | 13.26          | 18.24  | 24.05  | 26.29 |

4. The K/S value data of meta-aramid fibers with the action of CINDYE DNK at various temperatures and dye stuff types with a pressure 30 MPa, and a dyeing time 70 min, a dye concentration 4.5 %, a CO<sub>2</sub> flow 50 g/min, and a carrier concentration 80 %. in Figure 2 of reference [31] are shown in Table S4. The data with \* was the testing and prediction data.

Table S4 Effect of dye stuff types and temperature on K/S value

| Dye stuff types     | Temperature /°C |       |      |       |      |       |      |      |      |
|---------------------|-----------------|-------|------|-------|------|-------|------|------|------|
|                     | 80              | 90    | 100  | 110   | 120  | 130   | 140  | 150  | 160  |
| Disperse blue 79    | 0.91            | 1.31* | 1.69 | 2.29  | 2.90 | 3.70  | 4.32 | 4.72 | 4.86 |
| Disperse red 60     | 1.47            | 1.89  | 2.27 | 3.07* | 3.76 | 4.22  | 4.74 | 4.83 | 4.93 |
| Disperse yellow 114 | 1.10            | 1.81  | 2.49 | 2.96  | 3.33 | 4.30* | 4.15 | 5.29 | 5.37 |

5. The K/S value data of meta-aramid fibers with the action of CINDYE DNK at various pressures and dye stuff types with a temperature 140°C, a dyeing time 70 min, a dye concentration 4.5 %, a CO<sub>2</sub> flow 50 g/min and a carrier concentration 80 % in Figure 3 of reference [31] are shown in Table S5. The data with \* was the testing and prediction data.

Table S5 Effect of dye stuff types and pressure on K/S value

| Dye stuff types     | Pressure /MPa |       |      |       |      |       |      |      |      |
|---------------------|---------------|-------|------|-------|------|-------|------|------|------|
|                     | 18            | 20    | 22   | 24    | 26   | 28    | 30   | 32   | 34   |
| Disperse blue 79    | 3.26          | 3.60* | 3.86 | 4.12  | 4.35 | 4.46  | 4.54 | 4.61 | 4.70 |
| Disperse red 60     | 3.68          | 3.86  | 3.99 | 4.25* | 4.50 | 4.60  | 4.70 | 4.76 | 4.81 |
| Disperse yellow 114 | 3.15          | 3.82  | 4.13 | 4.48  | 4.85 | 5.03* | 5.21 | 5.30 | 5.40 |

6. The K/S value data of meta-aramid fibers with the action of CINDYE DNK at various dyeing time and dye stuff types with a temperature 140°C, a pressure 30 MPa, a dye concentration 4.5 %, a CO<sub>2</sub> flow 50 g/min, and a carrier concentration 80 %. in Figure 4 of reference [31] are shown in Table S6. The data with \* was the testing and prediction data.

Table S6 The effect of dye stuff types and dyeing time on K/S value

| Dye stuff types     | Dyeing time /min |      |       |      |       |      |       |      |      |
|---------------------|------------------|------|-------|------|-------|------|-------|------|------|
|                     | 10               | 20   | 30    | 40   | 50    | 60   | 70    | 80   | 90   |
| Disperse blue 79    | 1.77             | 2.21 | 2.59* | 3.27 | 3.85  | 4.20 | 4.52  | 4.57 | 4.62 |
| Disperse red 60     | 2.06             | 2.62 | 3.24  | 3.66 | 4.07* | 4.38 | 4.75  | 4.80 | 4.87 |
| Disperse yellow 114 | 1.93             | 2.51 | 3.12  | 3.76 | 4.35  | 4.80 | 5.19* | 5.27 | 5.29 |

7. The K/S value data of polypropylene fibers at various pressures and temperatures in Figure 3 of reference [32] are shown in Table S7. The data with \* was the testing and prediction data.

Table S7 The effect of pressure and temperature on K/S value of polypropylene fibers

| Pressure /MPa | Temperature /°C |      |       |       |       |
|---------------|-----------------|------|-------|-------|-------|
|               | 90              | 100  | 110   | 120   | 130   |
| 20            | 0.70            | 0.72 | 0.74  | 0.77  | 0.79  |
| 22            | 0.93            | 0.99 | 1.19  | 1.25  | 1.31  |
| 24            | 1.07            | 1.19 | 1.28* | 1.36  | 1.45  |
| 26            | 1.14            | 1.27 | 1.38  | 1.49  | 1.52  |
| 28            | 1.20            | 1.33 | 1.46  | 1.55* | 1.61  |
| 30            | 1.18            | 1.31 | 1.42  | 1.52  | 1.56* |

8. The K/S value data of polypropylene fibers at various pressures and dyeing time in Figure 5 of reference [32] are shown in Table S8. The data with \* was the testing and prediction data.

Table S8 The influence of dyeing time and pressure on K/S value of polypropylene fibers

| Pressure /MPa | Dyeing time/ min |      |       |      |      |
|---------------|------------------|------|-------|------|------|
|               | 10               | 15   | 20    | 25   | 30   |
| 20            | 0.65*            | 0.81 | 1.12  | 1.19 | 1.20 |
| 22            | 0.69             | 1.19 | 1.28  | 1.36 | 1.40 |
| 24            | 0.75             | 1.28 | 1.41* | 1.43 | 1.48 |

|    |      |      |      |      |       |
|----|------|------|------|------|-------|
| 26 | 0.79 | 1.38 | 1.47 | 1.51 | 1.52  |
| 28 | 0.79 | 1.40 | 1.52 | 1.55 | 1.58* |

9. The K/S value data of meta-aramid fabric with the action of Disperse Blue Black 79 at a constant pressure of 30 MPa, a dyeing time of 70 min, a dye concentration of 4.5% o.m.f. (on the mass of fabric), a carrier concentration of 3% o.m.f. (on the mass of carbon dioxide) for liquid and 3% o.m.f. (on the mass of fabric) for solid, as well as a carbon dioxide flow of 40 g/min in Figure 2 of reference [33] are shown in Table S9. The data with \* was the testing and prediction data.

Table S9 The influence of carriers and temperature on K/S value of meta-aramid fabric

| Carriers       | Temperature /°C |       |       |       |      |
|----------------|-----------------|-------|-------|-------|------|
|                | 80              | 100   | 120   | 140   | 160  |
| Control sample | 1.20            | 1.23  | 1.47  | 1.92  | 2.04 |
| DMT            | 1.16            | 1.40* | 1.84  | 2.23  | 2.50 |
| Ethly alcohol  | 1.26            | 1.52  | 2.07* | 2.46  | 2.49 |
| CINDYE DNK     | 1.42            | 2.42  | 3.74  | 4.37* | 4.45 |

10. The K/S value data of meta-aramid fabric with the action of Disperse Blue Black 79 at a constant temperature of 140°C, a dyeing time of 70 min, a dye concentration of 4.5 % o.m.f.(onthemassoffabric), a carrier concentration of 3% o.m.f. (on the mass of carbon dioxide) for liquid and 3% o.m.f. (on the mass of fabric) for solid, as well as a carbon dioxide flow of 40 g/min in Figure 3 of reference [33] are shown in Table S10. The data with \* was the testing and prediction data.

Table S10 The influence of carriers and pressure on K/S value of meta-aramid fabric

| Carriers       | Pressure /MPa |      |       |       |       |
|----------------|---------------|------|-------|-------|-------|
|                | 18            | 22   | 26    | 30    | 34    |
| Control sample | 0.82          | 0.8  | 1.35  | 1.95  | 2.11  |
| DMT            | 0.90          | 1.17 | 1.83* | 2.27  | 2.50  |
| Ethly alcohol  | 1.40          | 1.80 | 2.29  | 2.50* | 2.64  |
| CINDYE DNK     | 2.06          | 2.81 | 3.68  | 4.36  | 4.38* |

11. The K/S value data of meta-aramid fabric with the action of Disperse Blue Black 79 meta-aramid fabrics was investigated in supercritical carbon dioxide at a constant temperature of 140°C, a dyeing pressure of 30 MPa, a dye concentration of 4.5% o.m.f. (on the mass of fabric), a carrier concentration of 3% o.m.f. (on the mass of carbon dioxide) for liquid and 3% o.m.f. (on the mass of fabric) for solid, as well as a carbon dioxide flow of 40 g/min in Figure 4 of reference [33] are shown in Table S11. The data with \* was the testing and prediction data.

Table S11 The influence of dyeing time and carriers on K/S value of meta-aramid fabric

| Carriers       | Dyeing time/min |      |       |       |       |
|----------------|-----------------|------|-------|-------|-------|
|                | 10              | 30   | 50    | 70    | 90    |
| Control sample | 0.65            | 1.10 | 1.42  | 1.97  | 1.99  |
| DMT            | 1.08            | 1.56 | 1.93* | 2.27  | 2.34  |
| Ethly alcohol  | 1.23            | 1.75 | 2.37  | 2.47* | 2.52  |
| CINDYE DNK     | 1.49            | 2.50 | 3.09  | 4.35  | 4.46* |

12. The dye uptake data of polyester fabric with the action of C. I. Disperse Blue 79 at constant pressure 20 MPa in Figure 1 of reference [34] are shown in Table S12. The data with \* was the testing and prediction data.

Table S12 The influence of dyeing time and temperature on dye uptake of polyester fabric

| Dyeing time<br>/min | Temperature /°C |        |        |        |        |        |
|---------------------|-----------------|--------|--------|--------|--------|--------|
|                     | 80              | 90     | 100    | 110    | 120    | 130    |
| 5                   | 0.2541          | 0.3462 | 0.8277 | 1.1755 | 2.2836 | 4.4031 |

|    |        |         |         |         |         |         |
|----|--------|---------|---------|---------|---------|---------|
| 10 | 0.3499 | 0.5418  | 1.0071  | 1.6659  | 3.2744  | 6.8232  |
| 15 | 0.4278 | 0.6011* | 1.1423  | 2.1402  | 3.9331  | 7.3911  |
| 20 | 0.5381 | 0.7213  | 1.3102* | 2.3565  | 4.5776  | 10.6401 |
| 30 | 0.6129 | 0.8382  | 1.5671  | 2.9022* | 5.5899  | 11.2103 |
| 40 | 0.7611 | 0.9478  | 1.9735  | 3.3208  | 6.4723* | 11.5848 |
| 60 | 0.7631 | 0.9503  | 1.9856  | 3.3215  | 6.4823  | 11.7302 |
| 90 | 0.763  | 0.9506  | 1.9853  | 3.3217  | 6.4834  | 11.7401 |

13. The dye uptake data of polyester film with the action of C. I. Disperse Blue 79 at constant temperature 393.2 K in Table 2 of reference [35] are shown in Table S13. The data with \* was the testing and prediction data.

Table S13 The influence of dyeing time and pressure on dye uptake of polyester film

| Pressure /MPa | Dyeing time/min |       |        |        |       |
|---------------|-----------------|-------|--------|--------|-------|
|               | 60              | 120   | 180    | 240    | 300   |
| 15.19         | 0.74            | 1.27  | 1.71   | 2.21   | 2.52  |
| 17.74         | 2.95            | 5.39* | 7.4    | 10.69  | 11.04 |
| 20.29         | 8.76            | 13.2  | 16.39* | 18.68  | 20.41 |
| 22.91         | 13.34           | 20.91 | 21.97  | 26.48  | 28    |
| 25.39         | 15.32           | 22    | 26.75  | 28.34* | 30.43 |

14. The dye uptake data of polyester textile fibers with the action of C. I. Disperse Blue 79 in Figure 6 of reference [35] are shown in Table S14. The data with \* was the testing and prediction data.

Table S14 The influence of dyeing time and temperature on dye uptake

| Temperature/°C | Dyeing time/min |       |        |       |       |
|----------------|-----------------|-------|--------|-------|-------|
|                | 10              | 30    | 60     | 80    | 100   |
| 60             | 0.50            | 0.65  | 0.75*  | 0.83  | 0.83  |
| 90             | 1.52            | 2.02  | 2.39*  | 2.46  | 2.46  |
| 120            | 9.95            | 10.68 | 11.84* | 11.90 | 11.84 |

## Reference:

- [29]. A Q Hou, B Chen, J J Dai, K Zhang. Using supercritical carbon dioxide as solvent to replace water in polyethylene terephthalate (PET) fabric dyeing procedures. *J. Clean. Prod.* (2010) 18:1009-1014.
- [30]. Z T Liu, L L Zhang, Z W Liu, Z Gao, W S Dong, H P Xiong, Y Peng and S W Tang. Supercritical CO<sub>2</sub> Dyeing of Ramie Fiber with Disperse Dye. *Ind. Eng. Chem. Res.* (2006) 45: 8932-8938.
- [31]. H D Zheng and L J Zheng. Dyeing of Meta-aramid Fibers with Disperse Dyes in Supercritical Carbon Dioxide. *Fiber. Polym.* (2014) 15: 1627-1634.
- [32]. H J Zhang, Z L Zhong, L L Feng, X P Quan. Research on Polypropylene Dyeing in Supercritical Carbon Dioxide. *Adv. Mater. Res.* (2011) 175-176: 646-650.
- [33]. H D Zheng, J Zhang, J Yan and L J Zheng. Investigations on the effect of carriers on meta-aramid fabric dyeing properties in supercritical carbon dioxide. *Rsc. Adv.* (2017) 7: 3470–3479.
- [34]. Hou Aiqin, Dai Jinin. Kinetics of dyeing of polyester with CI Disperse Blue 79 in supercritical carbon dioxide. *Color. Technol.* 2010, 121(1):18-20.
- [35]. K H Chang, H K Bae and J J Shim. Dyeing of pet textile fibers and films in supercritical carbon dioxide. *Korean J. of Chem. Eng.* (1996)13: 310-316.
